# Supplementary material
Source: PubMed Central journal article supplement (PMC4834983)
Supplement: NIHMS775634-supplement-supplement_1.pdf [file NIHMS775634-supplement-supplement_1.pdf]

## Supporting Information

### **Hirsutinolide series inhibit Stat3 activity, alter GCN1, MAP1B, Hsp105, G6PD, vimentin and importin $\alpha$ -2 expression, and induce antitumor effects against human glioma**

Gabriella Miklossy<sup>1,2</sup>, Ui Joung Youn<sup>3</sup>, Peibin Yue<sup>1,2</sup>, Mingming Zhang<sup>3</sup>, Chih-Hong Chen<sup>4</sup>, Tyvette S. Hilliard<sup>1,2</sup>, David Paladino<sup>1,2</sup>, Yifei Li<sup>4</sup>, Justin Choi<sup>4</sup>, Jann N. Sarkaria<sup>5</sup>, Joel K. Kawakami<sup>6</sup>, Supakit Wongwiwatthanakit<sup>3</sup>, Yuan Chen<sup>4</sup>, Dianqing Sun<sup>3</sup>, Leng Chee Chang<sup>3</sup>, and James Turkson<sup>1,2,\*</sup>

<sup>1</sup>Natural Products and Experimental Therapeutics and <sup>2</sup>Cancer Biology Programs, University of Hawaii Cancer Center, University of Hawaii at Manoa, Honolulu, HI, <sup>3</sup>Department of Pharmaceutical Sciences, The Daniel K. Inouye College of Pharmacy, University of Hawaii at Hilo, Hilo, HI, <sup>4</sup>Department of Molecular Medicine, Beckman Research Institute of the City of Hope, Duarte, CA, <sup>5</sup>Department of Radiation Oncology, Mayo Clinic, Rochester, MN, <sup>6</sup>Division of Natural Sciences and Mathematics, Chaminade University, Honolulu, HI

Content:

Materials and Methods

Figures and Figure Legends

Keywords: Natural products, hirsutinolides, Stat3, glioma, xenografts, antitumor effects, GCN1, Vimentin and importin  $\alpha$ -2, microtubule-associated protein 1B; thioredoxin reductase 1 cytoplasmic isoform 3; glucose-6-phosphate 1-dehydrogenase isoform a; heat shock protein105; and tumor necrosis factor  $\alpha$ -induced protein 2.

## Materials and Methods

All reagents and solvents were purchased from commercial sources and used without further purification.

### *Semi-synthesis of natural product analogs*

We performed re-synthesis of **22** or the semi-synthesis of its analogs using **14**, **8**, or **17** as a starting material to expand the existing SAR of isolated natural hirsutinolides (Scheme 1). This was accomplished by reacting the isolated major natural product components, **14**, **8** or **17** with a selected panel of carboxylic acids in the presence of dicyclohexylcarbodiimide (DCC) and catalytic amounts of 4-(dimethylamino)pyridine (DMAP) by conventional Steglich esterification<sup>1</sup>, affording the desired semi-synthetic derivatives in 40-85% yields. Due to the difficulty in removing the dicyclohexylurea byproduct and to further facilitate the purification process, Yamaguchi esterification protocol was employed to scale-up semi-synthesis of compound **22**<sup>2</sup>. Briefly, the Yamaguchi mixed anhydride was generated *in situ* from 2,4,6-trichlorobenzoyl chloride and tiglic acid<sup>3</sup>, followed by the treatment with **14** in the presence of catalytic DMAP in toluene to afford **22** in 78% yield (Scheme 2). Title compounds were purified by normal phase column chromatography, preparative TLC, and/or semi-preparative reverse phase HPLC. The spectroscopic data of our semi-synthetic **22** are in full agreement with those of isolated natural products<sup>4</sup>.

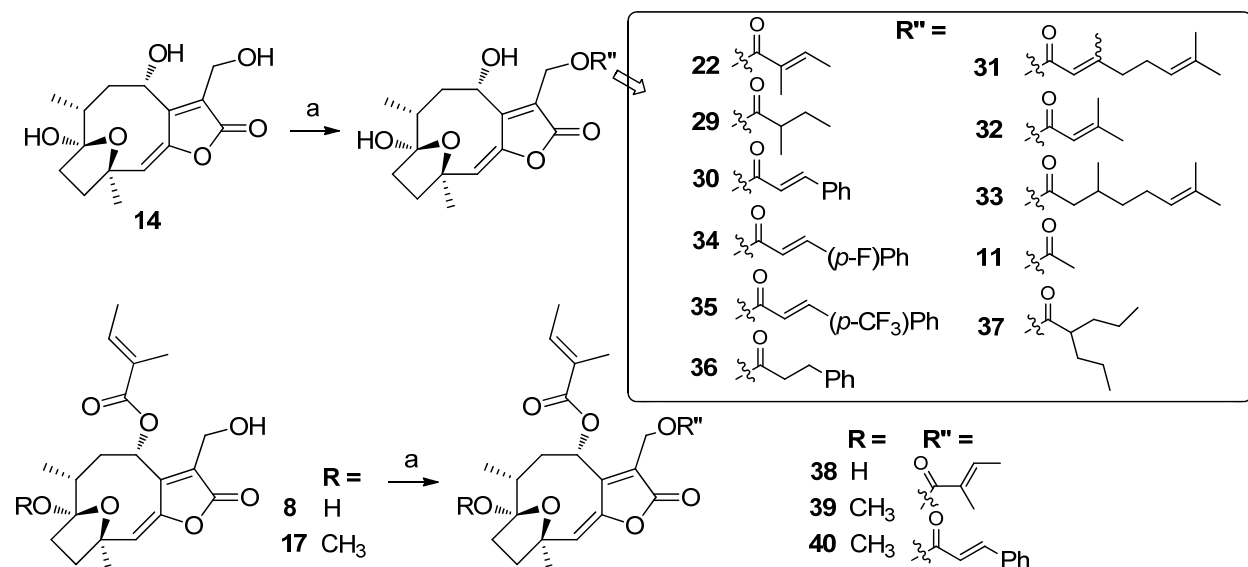

**Scheme S1.** Semi-synthesis of hirsutinolide derivatives. (a) Appropriate carboxylic acid ( $R''\text{COOH}$ ), DCC, DMAP,  $\text{CH}_2\text{Cl}_2$ , room temperature (rt), 24 h, 40-85%.

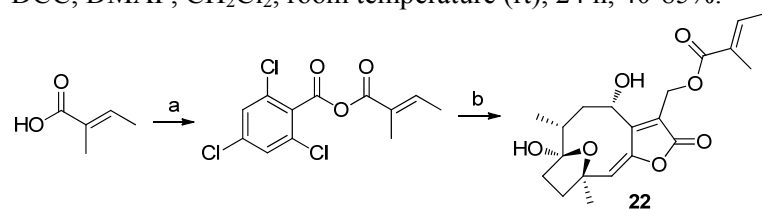

**Scheme S2.** Scale-up semi-synthesis of **22**. (a) 2,4,6-trichlorobenzoyl chloride, diisopropylethylamine (DIPEA), toluene, rt, 5 h, 32%. (b) **14**, DMAP, toluene, 50 °C, 24 h, 78%.

### *General information*

Solvents and reagents were purchased from Sigma-Aldrich and Fisher Scientific and were used without further purification. All reactions were monitored by either TLC or HPLC (Shimadzu LC-20A series system). Compounds were purified by flash column chromatography on silica gel using a Biotage Isolera One system, preparative silica gel TLC plate (w/UV254, glass backed, 500  $\mu\text{m}$ , 20  $\times$  20 cm; Sorbent Technologies), and/or semi-preparative reverse phase HPLC. Proton nuclear magnetic resonance ( $^1\text{H}$  NMR) spectra were recorded employing a Bruker AVANCE (400 MHz) spectrometer. Chemical shifts were expressed in parts per million (ppm),  $J$  values were in Hertz. Mass spectra were recorded on a Varian 500-MS IT mass spectrometer using ESI. The purity of compounds was determined by analytical HPLC (Shimadzu LC-20A series) using a Gemini, 3  $\mu\text{M}$ , C18, 110  $\text{\AA}$  column (50 mm  $\times$  4.6 mm, Phenomenex) and flow rate of 1 mL/min. Gradient conditions: solvent A (0.1% trifluoroacetic acid in water) and solvent B (acetonitrile): 0-2.0 min 100% A, 2.0-7.0 min 0-100% B (linear gradient), 7.0-8.0 min 100% B. UV detection at 254 nm and 284 nm. All the tested compounds were obtained with  $\geq 96.0\%$  purity by HPLC.

*General procedure for the semi-synthesis of hirsutinolide derivatives*

To a stirred solution of **14**, **8**, or **17** (0.0068 mmol) in anhydrous  $\text{CH}_2\text{Cl}_2$  (2 mL) was added DMAP (0.42 mg, 0.0034 mmol) and appropriate carboxylic acid (0.0136 mmol). DCC (2.81 mg, 0.0136 mmol) was added to the reaction at 0  $^\circ\text{C}$  and the reaction mixture was then stirred for 5 min at 0  $^\circ\text{C}$  and 24 h at room temperature. The residue was purified by preparative TLC (Hexane-Ethyl Acetate as developing solvent) and/or semi-preparative reverse phase HPLC to give desired target compounds in 40-85% yields.

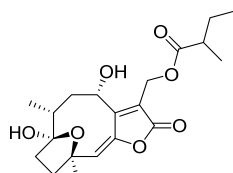

**(29)** ((4*S*,6*R*,*E*)-4,7-dihydroxy-6,10-dimethyl-2-oxo-2,4,5,6,7,8,9,10-octahydro-7,10-epoxycyclodeca[*b*]furan-3-yl)methyl 2-methylbutanoate. White amorphous powder (2.17 mg, 84%);  $^1\text{H}$  NMR (400 MHz,  $\text{CDCl}_3$ )  $\delta$  6.15 (d,  $J = 11.5$  Hz, 1H), 5.88 (s, 1H), 5.17 (dd,  $J = 12.4$ , 6.1 Hz, 1H), 4.98 – 4.86 (m, 2H), 2.52 (s, 1H), 2.45 – 2.39 (m, 1H), 2.36 (d,  $J = 7.7$  Hz, 1H), 2.31 – 2.21 (m, 3H), 2.11 – 2.07 (m, 1H), 1.87 (dd,  $J = 15.8$ , 7.0 Hz, 2H), 1.69 (s, 2H), 1.63 (s, 3H), 1.17 (dd,  $J = 7.0$ , 1.2 Hz, 3H), 0.99 (d,  $J = 6.9$  Hz, 3H), 0.93 (t,  $J = 8.0$  Hz, 3H). LRMS (ES+) calculated for  $[\text{C}_{20}\text{H}_{28}\text{O}_7 + \text{Na}]$  403.2, found 403.4. HPLC purity: 99.2% (254 nm),  $t_{\text{R}}$ : 6.54 min, 99.2% (284 nm),  $t_{\text{R}}$ : 6.54 min.

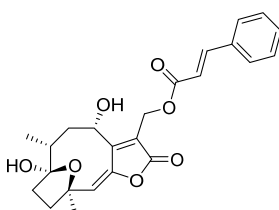

**(30)** ((4*S*,6*R*,*E*)-4,7-dihydroxy-6,10-dimethyl-2-oxo-2,4,5,6,7,8,9,10-octahydro-7,10-epoxycyclodeca[*b*]furan-3-yl)methyl cinnamate. White amorphous powder (2.46 mg, 85%);  $^1\text{H}$  NMR (400 MHz,  $\text{CDCl}_3$ )  $\delta$  7.74 (d,  $J = 16.0$  Hz, 1H), 7.53 (dd,  $J = 6.8$ , 2.9 Hz, 2H), 7.46 – 7.36 (m, 3H), 6.44 (d,  $J = 16.0$  Hz, 1H), 6.19 (d,  $J = 11.8$  Hz, 1H), 5.89 (s, 1H), 5.30 – 5.19 (m,

1H), 5.06 (s, 2H), 2.65 (s, 1H), 2.32 – 2.16 (m, 4H), 2.11 – 2.03 (m, 1H), 1.95 (dd,  $J = 12.1$ , 6.9 Hz, 1H), 1.92 – 1.84 (m, 1H), 1.63 (s, 3H), 0.97 (d,  $J = 6.8$  Hz, 3H). LRMS (ES+) calculated for  $[C_{24}H_{26}O_7 + Na]$  449.2, found 449.1. HPLC purity: 97.1% (254 nm),  $t_R$ : 6.72 min, 97.7% (284 nm),  $t_R$ : 6.54 min.

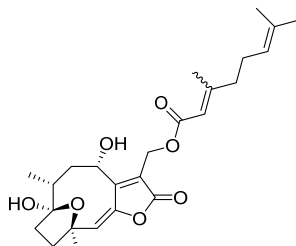

**(31)** ((4*S*,6*R*,*E*)-4,7-dihydroxy-6,10-dimethyl-2-oxo-2,4,5,6,7,8,9,10-octahydro-7,10-epoxycyclodeca[*b*]furan-3-yl)methyl 3,7-dimethylocta-2,6-dienoate. White amorphous powder (1.37 mg, 45%);  $^1H$  NMR (400 MHz,  $CDCl_3$ )  $\delta$  6.16 (t,  $J = 12.1$  Hz, 1H), 5.87 (d,  $J = 11.0$  Hz, 1H), 5.24 – 5.04 (m, 2H), 4.98 – 4.87 (m, 2H), 2.31 – 2.05 (m, 10H), 2.00 – 1.92 (m, 2H), 1.92 – 1.82 (m, 2H), 1.70 (s, 3H), 1.63 (d,  $J = 6.8$  Hz, 6H), 0.98 (t,  $J = 7.3$  Hz, 3H). LRMS (ES+) calculated for  $[C_{25}H_{34}O_7 + Na]$  469.2, found 469.5. HPLC purity: 99.8% (254 nm),  $t_R$ : 7.21 min, 99.9% (284 nm),  $t_R$ : 7.21 min.

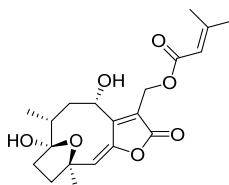

**(32)** ((4*S*,6*R*,*E*)-4,7-dihydroxy-6,10-dimethyl-2-oxo-2,4,5,6,7,8,9,10-octahydro-7,10-epoxycyclodeca[*b*]furan-3-yl)methyl 3-methylbut-2-enoate. White amorphous powder (1.26 mg, 49%);  $^1H$  NMR (400 MHz,  $CDCl_3$ )  $\delta$  6.14 (d,  $J = 11.8$  Hz, 1H), 5.86 (s, 1H), 5.70 – 5.64 (m, 1H), 5.24 – 5.16 (m, 1H), 4.98 – 4.88 (m, 2H), 2.60 (s, 1H), 2.30 – 2.11 (m, 6H), 2.11 – 2.04 (m, 1H), 2.01 – 1.79 (m, 6H), 1.62 (s, 3H), 0.97 (d,  $J = 6.8$  Hz, 3H). LRMS (ES+) calculated for  $[C_{20}H_{26}O_7 + Na]$  401.2, found 401.4. HPLC purity: 97.9% (254 nm),  $t_R$ : 6.43 min, 99.4% (284 nm),  $t_R$ : 6.43 min.

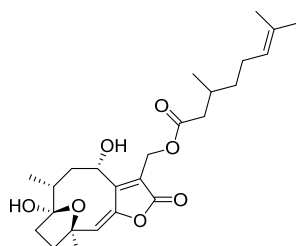

**(33)** ((4*S*,6*R*,*E*)-4,7-dihydroxy-6,10-dimethyl-2-oxo-2,4,5,6,7,8,9,10-octahydro-7,10-epoxycyclodeca[*b*]furan-3-yl)methyl 3,7-dimethyloct-6-enoate. White amorphous powder (2.34 mg, 77%);  $^1H$  NMR (400 MHz,  $CDCl_3$ )  $\delta$  6.17 (d,  $J = 11.6$  Hz, 1H), 5.88 (s, 1H), 5.24 – 5.12 (m, 1H), 5.09 (dd,  $J = 7.7$ , 6.4 Hz, 1H), 4.97 – 4.85 (m, 2H), 2.65 (s, 1H), 2.41 – 1.80 (m, 13H), 1.70 (d,  $J = 1.0$  Hz, 4H), 1.62 (s, 3H), 1.61 (s, 4H), 0.99 (d,  $J = 6.8$  Hz, 3H), 0.96 (d,  $J = 6.6$  Hz, 3H). LRMS (ES+) calculated for  $[C_{25}H_{36}O_7 + Na]$  471.2, found 471.4. HPLC purity: 98.9% (254 nm),  $t_R$ : 7.26 min, 98.8% (284 nm),  $t_R$ : 7.26 min.

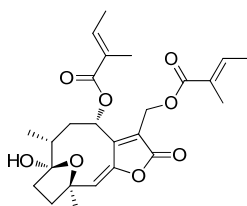

**(38) (4S,6R,E)-7-hydroxy-6,10-dimethyl-3-(((E)-2-methylbut-2-enoyloxy)methyl)-2-oxo-2,4,5,6,7,8,9,10-octahydro-7,10-epoxycyclodeca[b]furan-4-yl (E)-2-methylbut-2-enoate.** White amorphous powder (1.25 mg, 40%);  $^1\text{H NMR}$  (400 MHz,  $\text{CD}_3\text{OD}$ )  $\delta$  7.13 (dd,  $J = 7.1, 1.5$  Hz, 1H), 6.93 (dd,  $J = 7.0, 1.4$  Hz, 1H), 6.28 (d,  $J = 7.6$  Hz, 1H), 6.04 (s, 1H), 5.14 (d,  $J = 13.0$  Hz, 1H), 5.01 (d,  $J = 12.9$  Hz, 1H), 2.40 (dd,  $J = 16.2, 12.2$  Hz, 1H), 2.12 (dd,  $J = 11.5, 5.6$  Hz, 2H), 1.92 – 1.84 (m, 9H), 1.84 – 1.79 (m, 6H), 1.75 (s, 1H), 1.49 (s, 3H), 0.88 (d,  $J = 6.9$  Hz, 3H). LRMS (ES+) calculated for  $[\text{C}_{25}\text{H}_{32}\text{O}_8 + \text{Na}]$  483.2, found 483.4. HPLC purity: 99.7% (254 nm),  $t_{\text{R}}$ : 7.14 min, 99.7% (284 nm),  $t_{\text{R}}$ : 7.14 min.

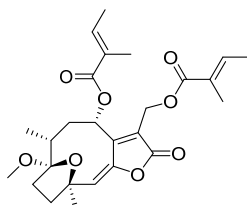

**(39) (4S,6R,E)-7-methoxy-6,10-dimethyl-3-(((E)-2-methylbut-2-enoyloxy)methyl)-2-oxo-2,4,5,6,7,8,9,10-octahydro-7,10-epoxycyclodeca[b]furan-4-yl (E)-2-methylbut-2-enoate.** White amorphous powder (1.35 mg, 42%);  $^1\text{H NMR}$  (400 MHz,  $\text{CDCl}_3$ )  $\delta$  7.05 (dd,  $J = 7.1, 1.5$  Hz, 1H), 6.95 – 6.84 (m, 1H), 6.27 (d,  $J = 7.6$  Hz, 1H), 5.87 (s, 1H), 5.20 (d,  $J = 13.1$  Hz, 1H), 5.07 (d,  $J = 12.9$  Hz, 1H), 3.29 (s, 3H), 2.38 (dd,  $J = 15.6, 11.9$  Hz, 1H), 2.23 – 2.07 (m, 2H), 2.02 – 1.86 (m, 3H), 1.84 (dt,  $J = 2.6, 1.3$  Hz, 6H), 1.80 (dd,  $J = 7.1, 1.1$  Hz, 6H), 1.76 (d,  $J = 10.0$  Hz, 1H), 1.51 (s, 3H), 0.86 (d,  $J = 7.0$  Hz, 3H). LRMS (ES+) calculated for  $[\text{C}_{26}\text{H}_{34}\text{O}_8 + \text{Na}]$  497.2, found 497.5. HPLC purity: 99.8% (254 nm),  $t_{\text{R}}$ : 7.76 min, 99.8% (284 nm),  $t_{\text{R}}$ : 7.76 min.

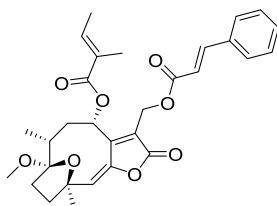

**(40) (4S,6R,E)-3-((cinnamoyloxy)methyl)-7-methoxy-6,10-dimethyl-2-oxo-2,4,5,6,7,8,9,10-octahydro-7,10-epoxycyclodeca[b]furan-4-yl (E)-2-methylbut-2-enoate.** White amorphous powder (2.91 mg, 82%);  $^1\text{H NMR}$  (400 MHz,  $\text{CDCl}_3$ )  $\delta$  7.73 (d,  $J = 16.0$  Hz, 1H), 7.53 (dd,  $J = 6.7, 2.9$  Hz, 2H), 7.45 – 7.37 (m, 3H), 7.06 (dd,  $J = 7.1, 1.5$  Hz, 1H), 6.43 (d,  $J = 16.0$  Hz, 1H), 6.34 (d,  $J = 7.8$  Hz, 1H), 5.90 (s, 1H), 5.30 (d,  $J = 13.0$  Hz, 1H), 5.14 (d,  $J = 12.9$  Hz, 1H), 3.29 (s, 3H), 2.41 (dd,  $J = 15.8, 11.3$  Hz, 1H), 2.23 – 2.06 (m, 2H), 1.95 (ddd,  $J = 16.9, 15.8, 9.5$  Hz, 3H), 1.85 (dd,  $J = 5.8, 4.5$  Hz, 4H), 1.80 (dd,  $J = 7.1, 1.1$  Hz, 3H), 1.51 (s, 3H), 0.87 (d,  $J = 6.9$  Hz, 3H). LRMS (ES+) calculated for  $[\text{C}_{30}\text{H}_{34}\text{O}_8 + \text{Na}]$  545.2, found 545.2. HPLC purity: 96.0% (254 nm),  $t_{\text{R}}$ : 7.88 min, 97.5% (284 nm),  $t_{\text{R}}$ : 7.88 min.

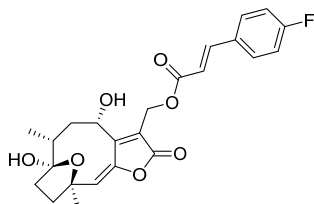

(34) **((4S,6R,E)-4,7-dihydroxy-6,10-dimethyl-2-oxo-2,4,5,6,7,8,9,10-octahydro-7,10-epoxycyclodeca[b]furan-3-yl)methyl (E)-3-(4-fluorophenyl)acrylate.** White amorphous powder (1.6 mg, 53%);  $^1\text{H NMR}$  (400 MHz,  $\text{CDCl}_3$ )  $\delta$  7.69 (d,  $J = 16.0$  Hz, 1H), 7.58 – 7.46 (m, 2H), 7.10 (t,  $J = 8.6$  Hz, 2H), 6.36 (d,  $J = 16.0$  Hz, 1H), 6.17 (d,  $J = 11.8$  Hz, 1H), 5.90 (s, 1H), 5.29 – 5.20 (m, 1H), 5.05 (s, 2H), 2.59 (s, 1H), 2.33 – 2.16 (m, 4H), 2.11 – 2.03 (m, 1H), 1.95 (dd,  $J = 12.1, 6.8$  Hz, 1H), 1.91 – 1.83 (m, 1H), 1.63 (s, 3H), 0.97 (d,  $J = 6.8$  Hz, 3H). LRMS (ES+) calculated for  $[\text{C}_{24}\text{H}_{25}\text{FO}_7 + \text{Na}]$  467.1, found 467.1. HPLC purity: 96.4% (254 nm),  $t_{\text{R}}$ : 6.77 min, 97.2% (284 nm),  $t_{\text{R}}$ : 6.77 min.

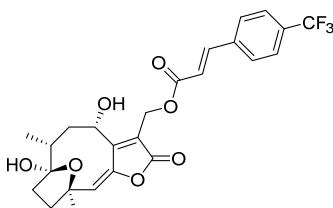

(35) **((4S,6R,E)-4,7-dihydroxy-6,10-dimethyl-2-oxo-2,4,5,6,7,8,9,10-octahydro-7,10-epoxycyclodeca[b]furan-3-yl)methyl (E)-3-(4-(trifluoromethyl)phenyl)acrylate.** White amorphous powder (1.6 mg, 48%);  $^1\text{H NMR}$  (400 MHz,  $\text{CDCl}_3$ )  $\delta$  7.74 (d,  $J = 16.0$  Hz, 1H), 7.65 (q,  $J = 8.5$  Hz, 4H), 6.51 (d,  $J = 16.0$  Hz, 1H), 6.19 (d,  $J = 11.8$  Hz, 1H), 5.91 (s, 1H), 5.25 (dd,  $J = 11.8, 5.4$  Hz, 1H), 5.07 (s, 2H), 2.58 (s, 1H), 2.34 – 2.15 (m, 4H), 2.13 – 2.03 (m, 1H), 1.96 (dd,  $J = 13.3, 5.9$  Hz, 1H), 1.92 – 1.82 (m, 1H), 1.63 (s, 3H), 0.98 (d,  $J = 6.8$  Hz, 3H). LRMS (ES+) calculated for  $[\text{C}_{25}\text{H}_{25}\text{F}_3\text{O}_7 + \text{Na}]$  517.1, found 517.1. HPLC purity: 96.3% (254 nm),  $t_{\text{R}}$ : 7.04 min, 96.3% (284 nm),  $t_{\text{R}}$ : 7.04 min.

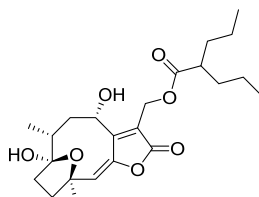

(37) **((4S,6R,E)-4,7-dihydroxy-6,10-dimethyl-2-oxo-2,4,5,6,7,8,9,10-octahydro-7,10-epoxycyclodeca[b]furan-3-yl)methyl 2-propylpentanoate.** White amorphous powder (1.4 mg, 49%);  $^1\text{H NMR}$  (400 MHz,  $\text{CDCl}_3$ )  $\delta$  6.16 (d,  $J = 11.8$  Hz, 1H), 5.89 (s, 1H), 5.21 – 5.12 (m, 1H), 4.91 (dd,  $J = 30.8, 12.9$  Hz, 2H), 2.58 (s, 1H), 2.45 – 2.34 (m, 1H), 2.24 (ddd,  $J = 15.7, 13.0, 10.7$  Hz, 3H), 2.11 – 2.03 (m, 1H), 1.92 (ddd,  $J = 15.7, 9.4, 5.5$  Hz, 2H), 1.63 (s, 3H), 1.44 (dddd,  $J = 10.5, 7.7, 6.6, 4.0$  Hz, 2H), 1.36 – 1.23 (m, 6H), 1.00 (d,  $J = 6.8$  Hz, 2H), 0.91 (td,  $J = 7.3, 1.2$  Hz, 6H). LRMS (ES+) calculated for  $[\text{C}_{23}\text{H}_{34}\text{O}_7 + \text{Na}]$  445.2, found 445.1. HPLC purity: 99.0% (254 nm),  $t_{\text{R}}$ : 7.09 min, 99.0% (284 nm),  $t_{\text{R}}$ : 7.09 min.

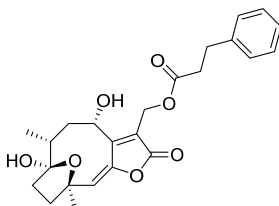

**(36)** ((4*S*,6*R*,*E*)-4,7-dihydroxy-6,10-dimethyl-2-oxo-2,4,5,6,7,8,9,10-octahydro-7,10-epoxycyclodeca[*b*]furan-3-yl)methyl 3-phenylpropanoate. White amorphous powder (2.0 mg, 69%); <sup>1</sup>H NMR (400 MHz, CDCl<sub>3</sub>) δ 7.34 – 7.17 (m, 5H), 6.15 (d, *J* = 11.8 Hz, 1H), 5.88 (s, 1H), 5.17 – 5.08 (m, 1H), 4.91 (s, 2H), 2.97 (t, *J* = 7.7 Hz, 2H), 2.66 (dd, *J* = 8.4, 7.2 Hz, 2H), 2.57 (s, 1H), 2.28 – 2.15 (m, 4H), 2.10 – 2.02 (m, 1H), 1.90 (dd, *J* = 10.9, 5.8 Hz, 1H), 1.78 (ddd, *J* = 15.9, 6.9, 2.4 Hz, 1H), 1.62 (s, 3H), 0.96 (d, *J* = 6.8 Hz, 3H). LRMS (ES<sup>+</sup>) calculated for [C<sub>24</sub>H<sub>28</sub>O<sub>7</sub> + Na] 451.2, found 451.1. HPLC purity: 98.9% (254 nm), *t*<sub>R</sub>: 6.68 min, 98.9% (284 nm), *t*<sub>R</sub>: 6.68 min.

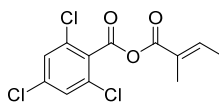

**(*E*)-2,4,6-trichlorobenzoyl (*E*)-2-methylbut-2-enoic anhydride.** To a premixed solution of tiglic acid (300 mg, 3.0 mmol) and diisopropylethylamine (DIPEA, 0.62 mL, 3.6 mmol) in CH<sub>2</sub>Cl<sub>2</sub> (15 mL) was added 2,4,6-trichlorobenzoyl chloride (0.61 mL, 3.6 mmol) dropwise at 0 °C. The resulting solution was stirred at room temperature for 5 h. Dry ether (20 mL) was then added to precipitate DIPEA hydrochloride, followed by the filtration. The filtrate solution was concentrated and the residue was purified by flash column chromatography (1 : 3, CH<sub>2</sub>Cl<sub>2</sub> : hexanes) to afford the mixed anhydride as a white crystalline solid (293 mg, 32%). <sup>1</sup>H NMR (400 MHz, CDCl<sub>3</sub>) δ 7.43 – 7.36 (m, 2H), 7.17 – 7.10 (m, 1H), 1.91 (dd, *J* = 2.2, 0.9 Hz, 3H), 1.91 – 1.88 (m, 3H). HPLC purity: 98.4% (254 nm), *t*<sub>R</sub>: 7.55 min, 98.7% (284 nm), *t*<sub>R</sub>: 7.55 min.

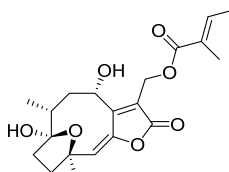

**(22)** ((4*S*,6*R*,*E*)-4,7-dihydroxy-6,10-dimethyl-2-oxo-2,4,5,6,7,8,9,10-octahydro-7,10-epoxycyclodeca[*b*]furan-3-yl)methyl (*E*)-2-methylbut-2-enoate. To a solution of **14** (18 mg, 0.061 mmol) in toluene (2 mL) was added DMAP (3.7 mg, 0.035 mmol) at room temperature. A solution of (*E*)-2,4,6-trichlorobenzoyl (*E*)-2-methylbut-2-enoic anhydride (37.3 mg, 0.122 mmol) in toluene (1 mL) was next added, the reaction was heated at 80 °C for 24 h. After cooling to room temperature, the reaction mixture was concentrated under reduced pressure and purified by flash column chromatography on silica gel (1: 5 to 1 : 2, ethyl acetate : hexanes), affording the title compound **22** as a white solid (19.6 mg, 85%). <sup>1</sup>H NMR (400 MHz, CDCl<sub>3</sub>) δ 6.89 (qd, *J* = 7.0, 1.4 Hz, 1H), 6.15 (d, *J* = 11.8 Hz, 1H), 5.87 (s, 1H), 5.19 (ddd, *J* = 11.8, 6.8, 1.4 Hz, 1H), 4.97 (s, 2H), 2.25 (dd, *J* = 9.1, 6.7 Hz, 1H), 2.20 (d, *J* = 3.0 Hz, 1H), 2.18 (t, *J* = 5.0 Hz, 1H), 2.10 – 2.05 (m, 1H), 1.97 – 1.89 (m, 1H), 1.89 – 1.85 (m, 1H), 1.86 – 1.83 (m, 3H), 1.81 (dd, *J* = 7.1, 1.1 Hz, 3H), 1.62 (s, 3H), 0.96 (d, *J* = 6.8 Hz, 3H). LRMS (ES<sup>+</sup>) calculated for [C<sub>20</sub>H<sub>26</sub>O<sub>7</sub> + Na] 401.2, found 401.4. HPLC purity: 99.4% (254 nm), *t*<sub>R</sub>: 6.42 min, 99.2% (284 nm), *t*<sub>R</sub>: 6.42 min.

## References

1. Neises B, Steglich W: Simple method for the esterification of carboxylic acids. *Angew Chem Int Ed Engl* **1978**, 17:522-524
2. Inanaga J, Hirata K, Saeki H, Katsuki T, Yamaguchi M: A rapid esterification by means of mixed anhydride and its application to large-ring lactonization. *Bull Chem Soc Jpn* **1979**, 52:1989-1993
3. Ball M, Andrews SP, Wierschem F, Cleator E, Smith MD, Ley SV: Total synthesis of thapsigargin, a potent SERCA pump inhibitor. *Org Lett* **2007**, 9:663-666
4. Youn UJ, Miklossy G, Chai X, Wongwiwatthanakit S, Toyama O, Songsak T, Turkson J, Chang LC: Bioactive sesquiterpene lactones and other compounds isolated from *Vernonia cinerea*. *Fitoterapia* **2014**, 93:194-200



Supplementary Figures

Fig. S1

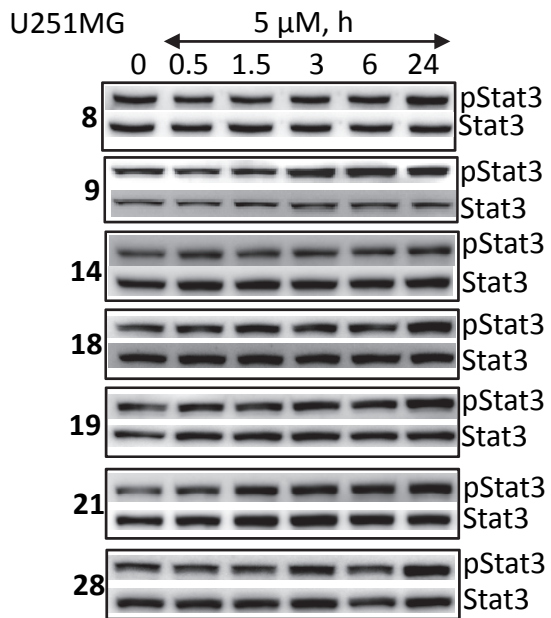

Figure S1. **Hirsutinolides inhibit Stat3 activation in tumor cells.** U251MG cells in culture were treated with 5  $\mu$ M **8**, **14**, **18**, **19**, **21** or **28**, and whole-cell lysates of equal total protein prepared and subjected to immunoblotting analysis for pY705Stat3 and Stat3. Positions of proteins in gel are labeled; control lane (0) represents whole-cell lysates prepared from cells treated with 0.025% DMSO. Data are representative of 2-3 independent determinations.

Fig. S2.

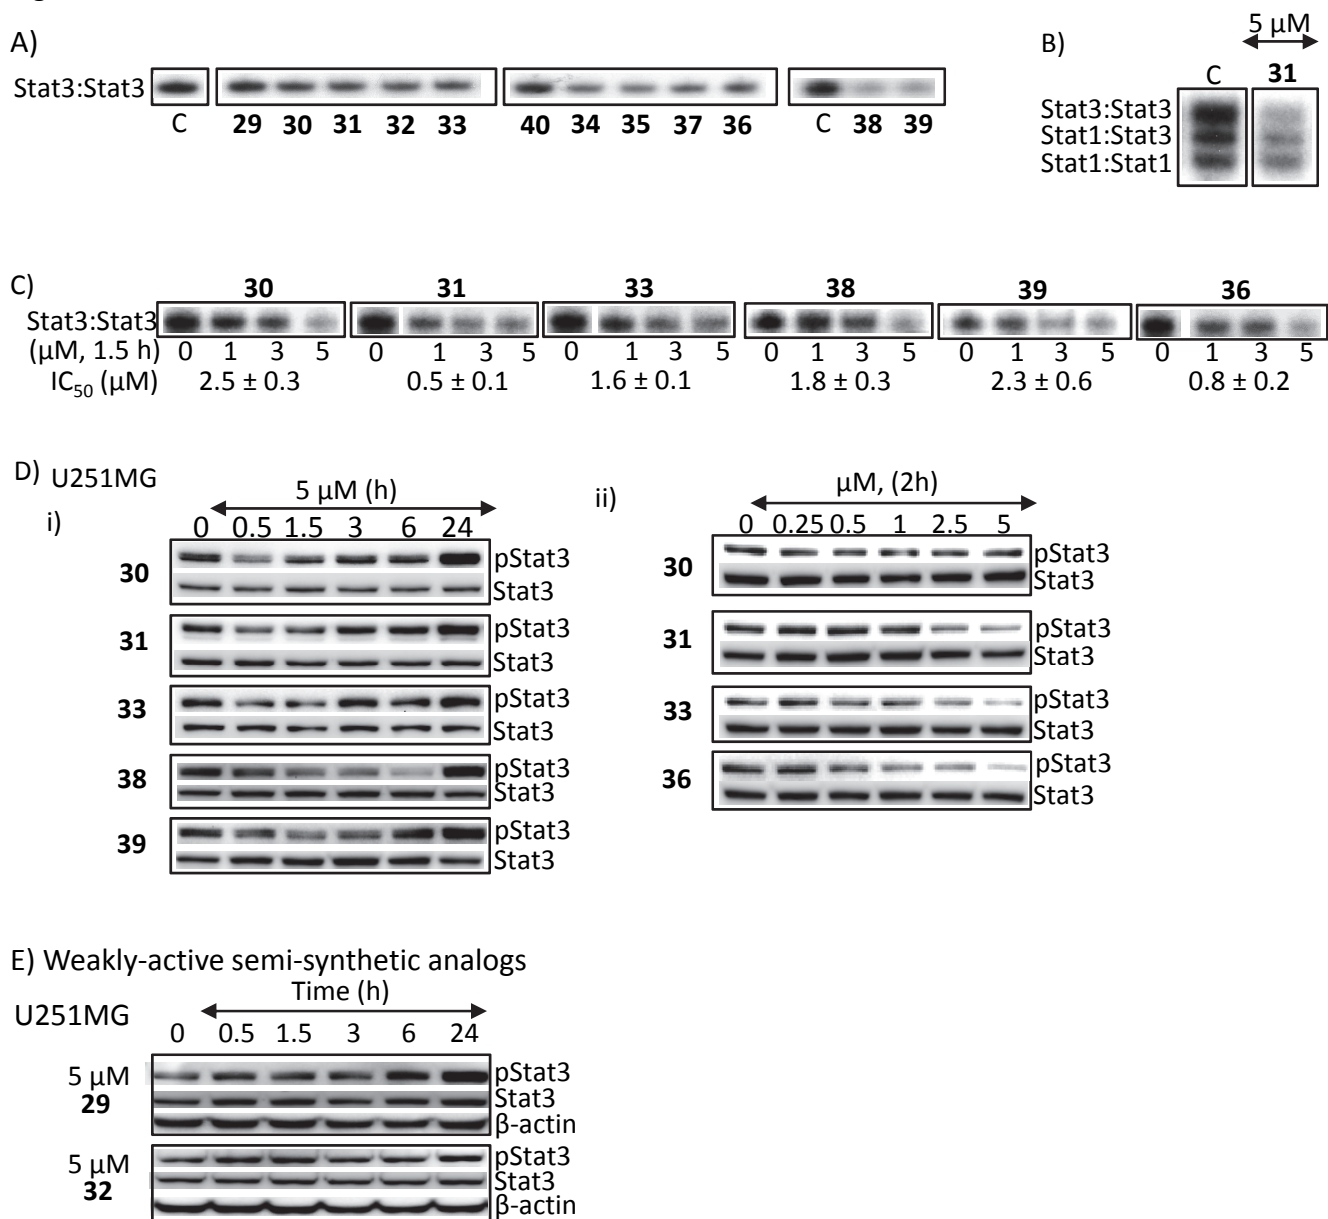

**Figure S2. Semi-synthetic analogs inhibit Stat3 activation.** (A-C) Nuclear extracts containing activated (A and B) Stat3 from NIH3T3/v-Src fibroblasts or (C) Stat1 and Stat3 from EGF-stimulated NIH3T3/hEGFR were pre-incubated with the designated semi-synthetic analogs for 30 min at room temperature prior to incubating with the radiolabeled hSIE probe that binds Stat1 and Stat3 and performing EMSA analysis; (D and E) Immunoblotting analysis of whole-cell lysates prepared from U251MG cells treated with the designated compounds at (D(i) and E) 5  $\mu$ M for 0-24 h or (D(ii)) 0-5  $\mu$ M for 2 h and probing for pStat3, Stat3 or  $\beta$ -actin. Positions of proteins or Stats:DNA complex in gel are labeled; control lane (c, 0) represents whole-cell lysates or nuclear extracts prepared from 0.025% DMSO-treated cells or nuclear extracts pre-treated with 0.025% DMSO. Bands corresponding to Stats:DNA complexes were scanned and quantified using ImageJ, plotted against concentration of agent from which  $IC_{50}$  values were derived. Data are representative of 2-3 independent determinations.

Fig. S3

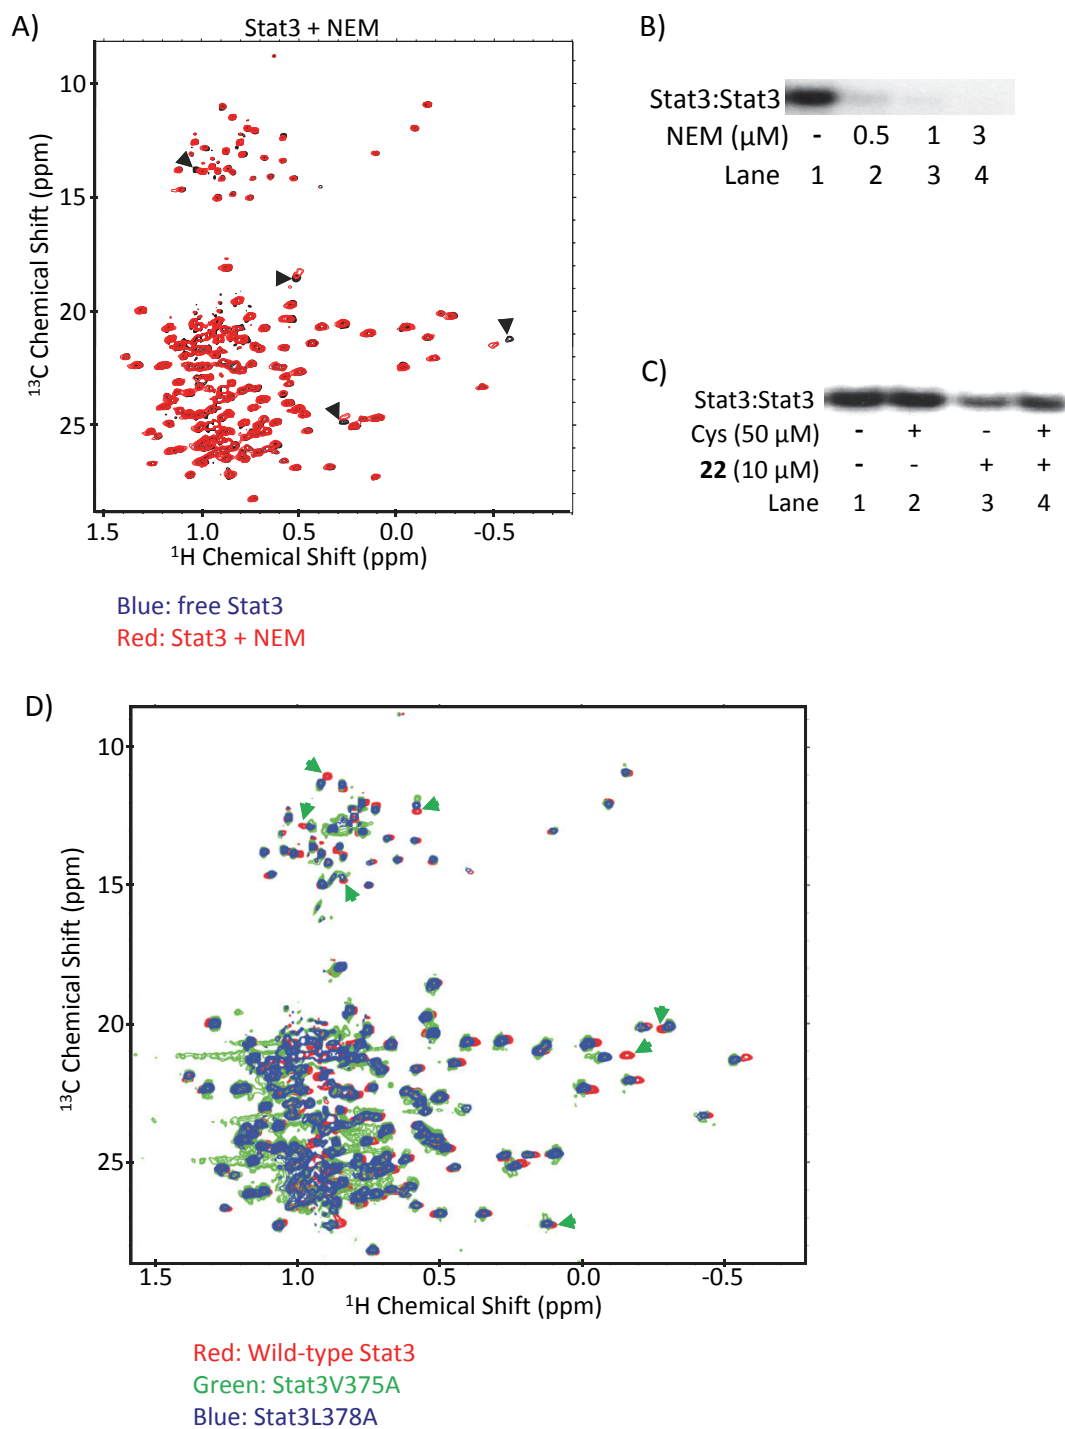

**Figure S3. NMR analysis of wild-type and mutated Stat3 in solution with or without NEM and Stat3 DNA-binding activity and the effects of NEM or 22 in the presence or absence of Cysteine.** (A) Overlay of the  $^1\text{H}$ - $^{13}\text{C}$  HMQC spectra of wild-type Stat3, free (black) or wild-type Stat3 in the presence of NEM (red) showing residues with significant changes in either resonance line-widths or NMR chemical shifts that are indicated by arrowheads; (B and C) Stat3 DNA-binding assay of nuclear extracts prepared from NIH3T3/v-Src fibroblasts containing activated Stat3 pre-incubated for 30 min with (B) 0-3  $\mu\text{M}$  NEM or (C) 10  $\mu\text{M}$  **22** in the presence or absence of 50  $\mu\text{M}$  cysteine (Cys) prior to incubation with the radiolabeled hSIE probe that binds Stat3 and subjecting to EMSA analysis; and (D) Overlay of the  $^1\text{H}$ - $^{13}\text{C}$  HMQC spectra of Stat3, wild-type (red) and mutant Stat3V375A (green) and Stat3L378A (blue). NEM-induced peak shifts or similar types are indicated by black arrowheads; peaks that are shifted and not due to treatment with NEM are indicated by green arrowheads. Positions of Stat3:DNA complex in gel are labeled; control lane (-) represents nuclear extracts pre-treated with 0.025% DMSO. Data are representative of 2-3 independent determinations.

Fig. S4

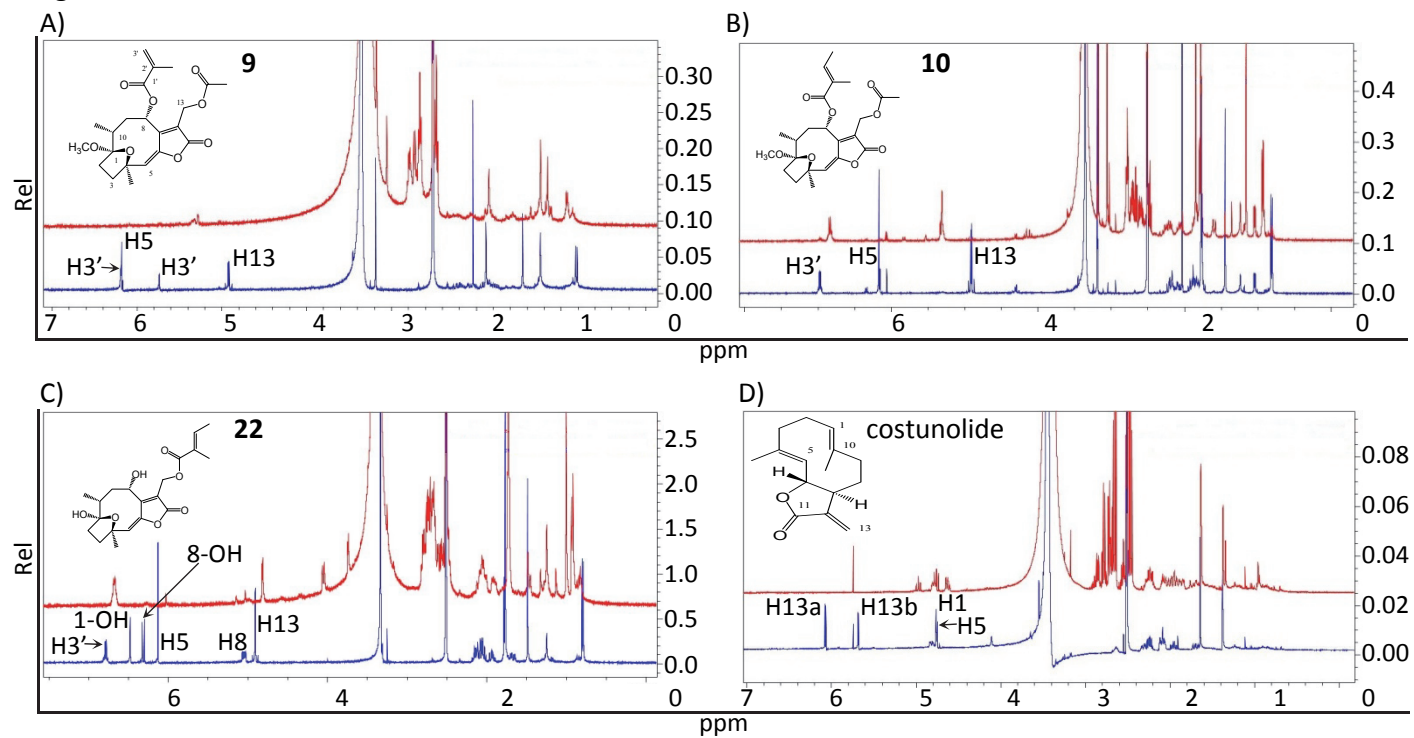

Blue: Compound alone

Red: Compound + 2 molar equivalent of cysteamine

Figure S4.  $^1\text{H}$  NMR spectra of (A) **9**, (B) **10**, (C) **22** and (D) costunolide in  $\text{DMSO-}d_6$  and the effects of the reactions with cysteamine (red) compared to compound alone control (blue). Data are representative of 2 independent determinations.



Fig. S5.

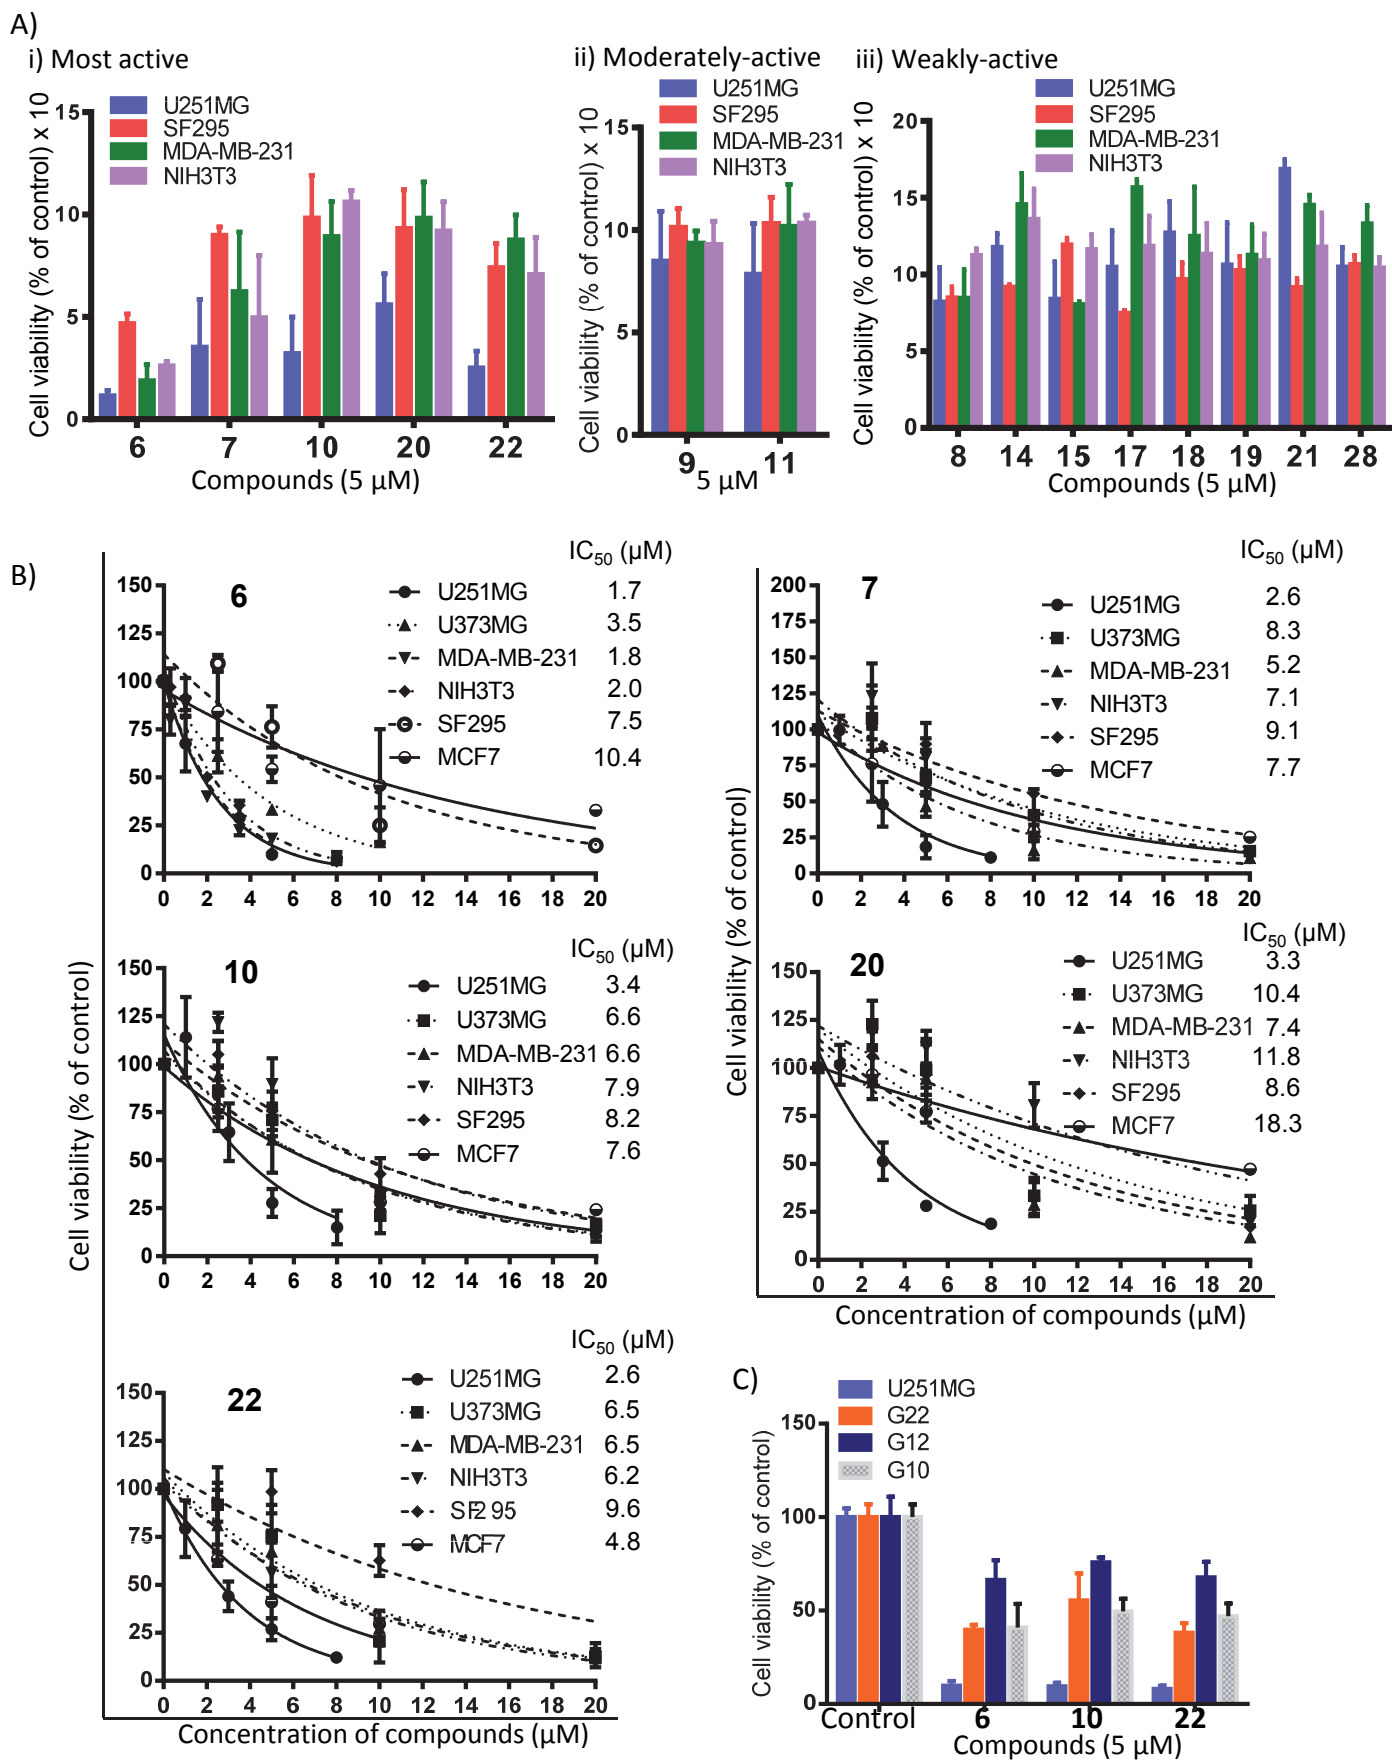

Fig. S5.

D)

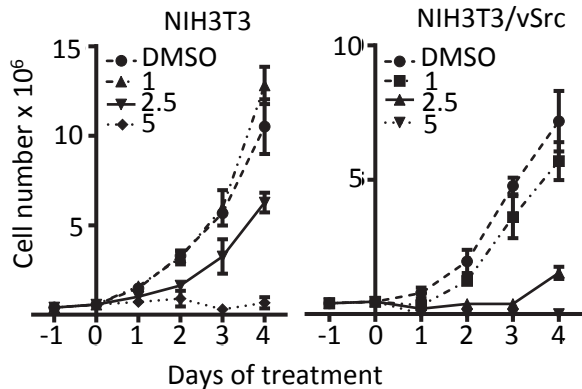

E) i)

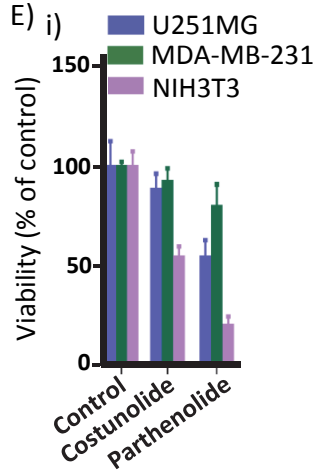

ii)

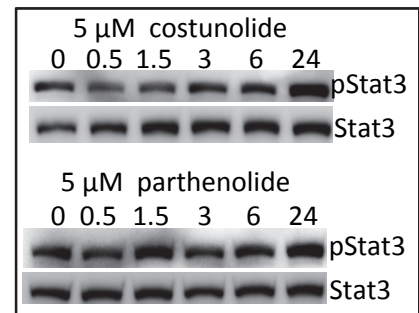

F) Semi-synthesized analogs

i) Most active

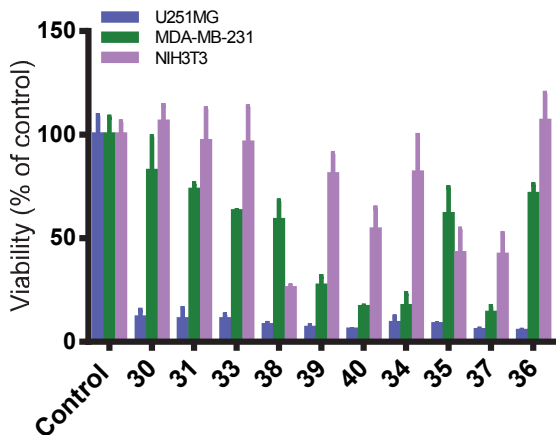

ii) Moderately active

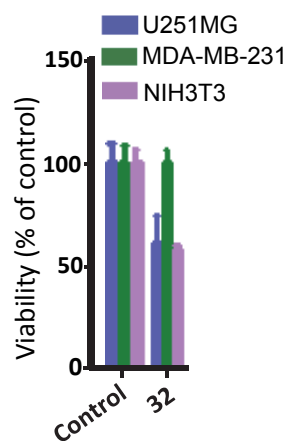

iii) Weakly active

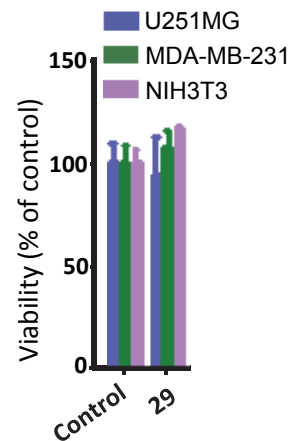

G) Dose-response studies of semi-synthesized analogs

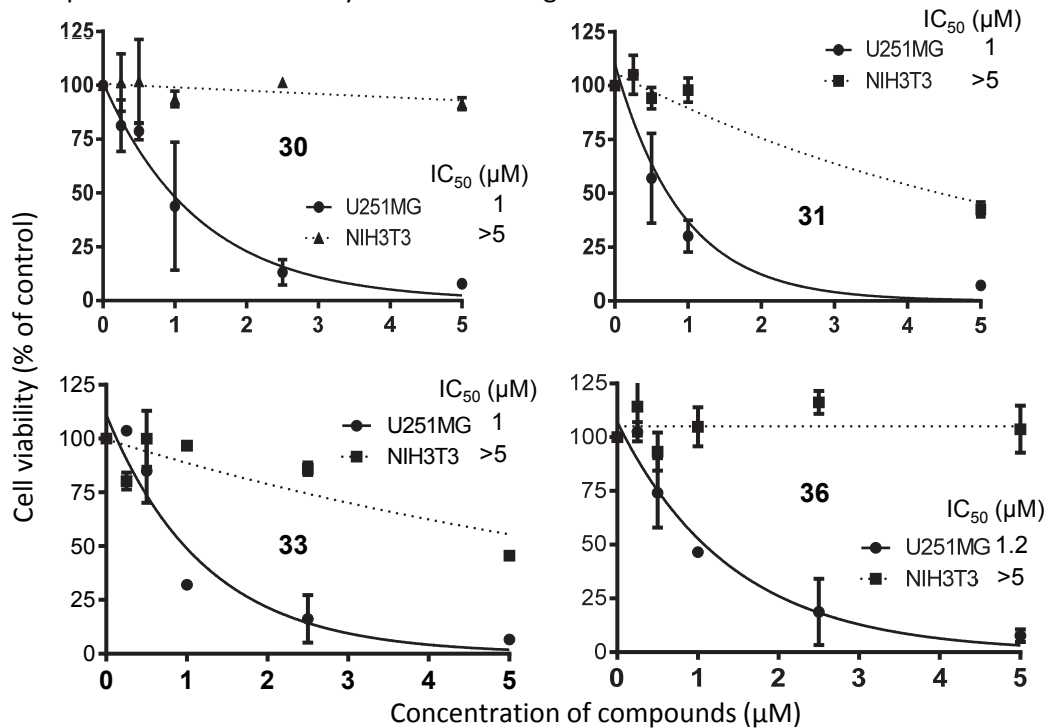

Fig. S5.

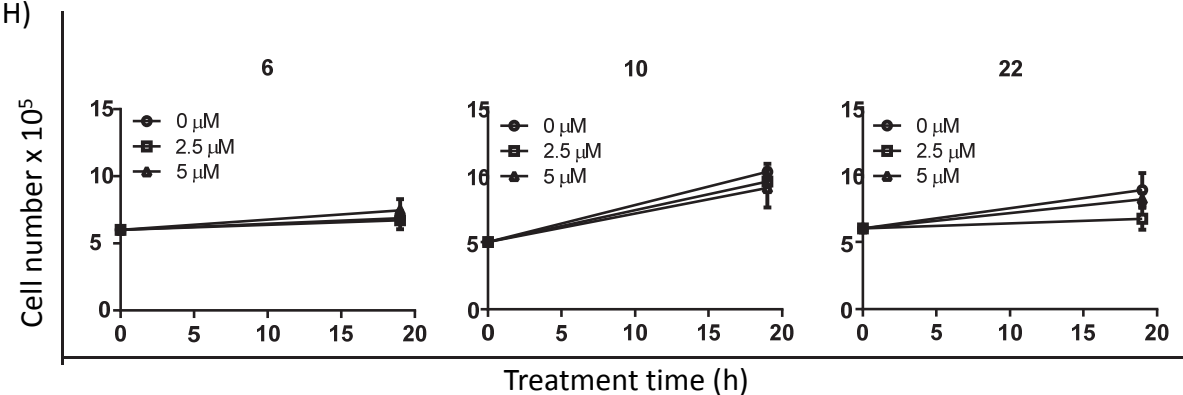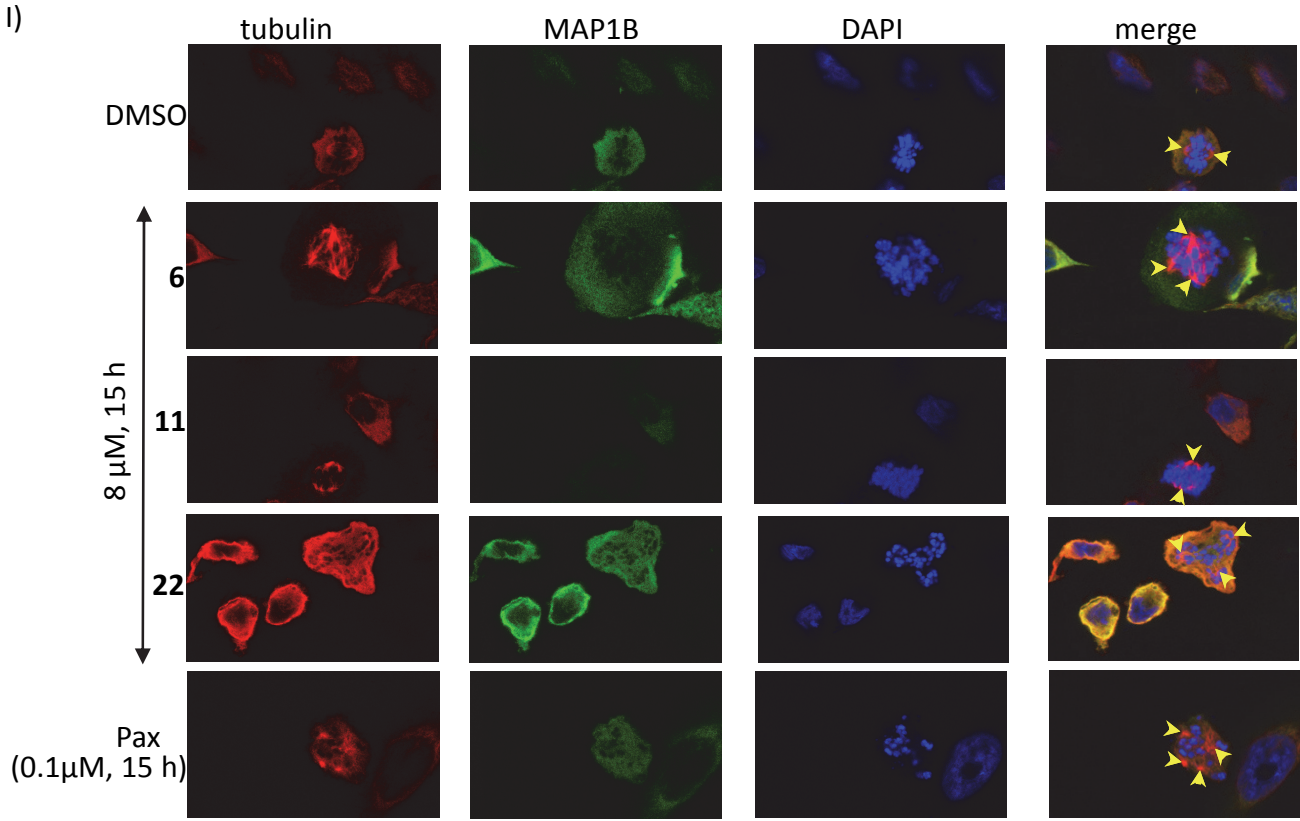

Fig. S5.

J)

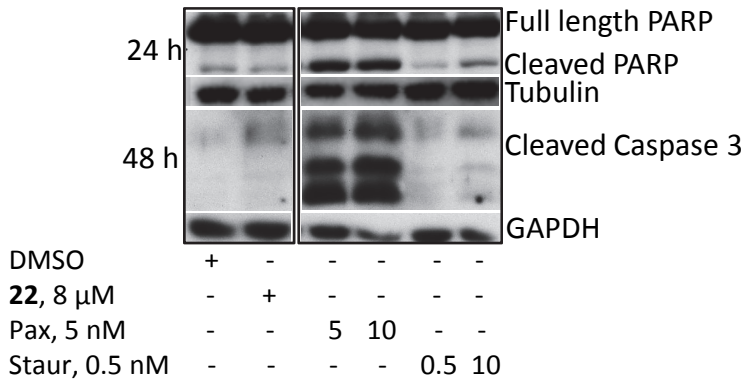

K)

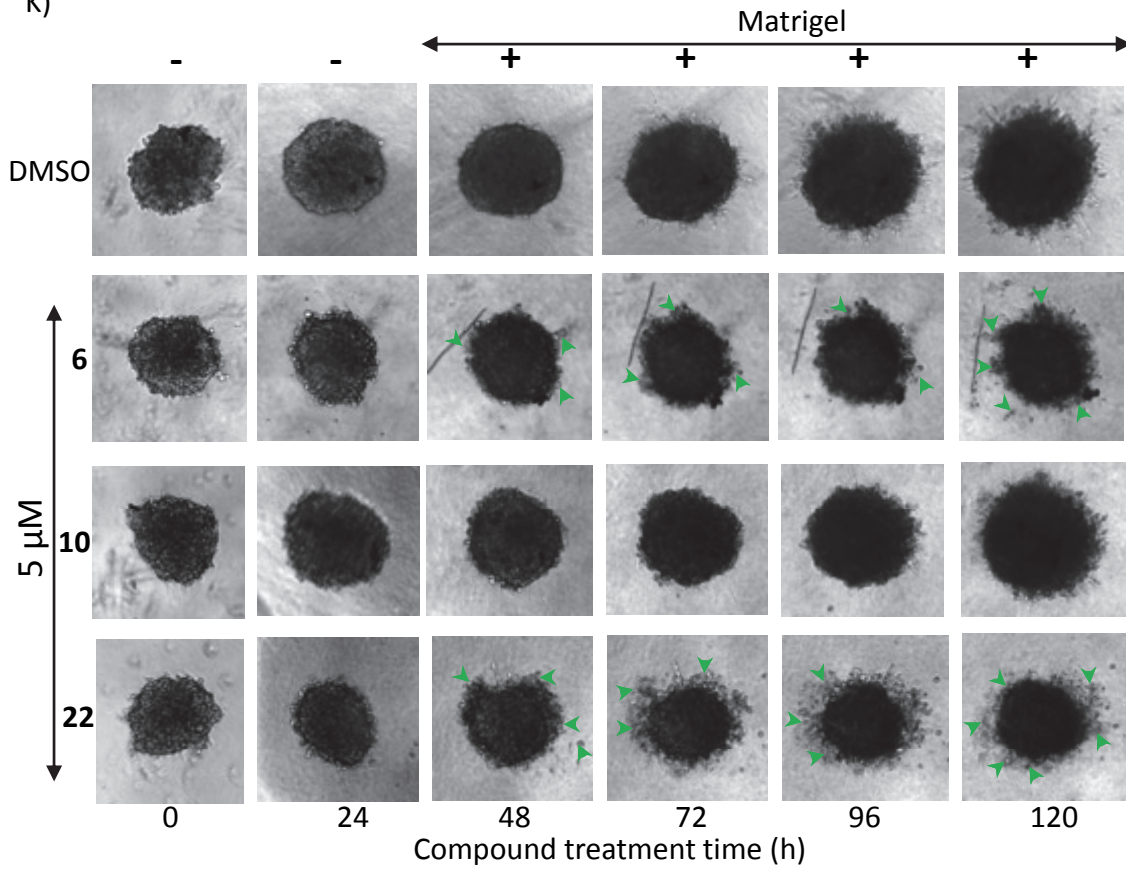

Figure S5. **Effects of hirsutinolides or semi-synthetic analogs on growth and viability of glioma cells in culture and as 3D spheroids.** (A-C) Cell viability plots for the effects on (A and B) human tumor or mouse cell lines and (C) patient-derived xenograft cells, G22 of 72-h treatments with (A) the designated hirsutinolides at 5  $\mu$ M, (B) 0-20  $\mu$ M **6**, **7**, **10**, **20** or **22**, and (C) 5  $\mu$ M **6**, **10** or **22**. Insert,  $IC_{50}$  values determined from the dose-response curves; (D) Trypan blue exclusion/phase contrast microscopy for viable cell numbers and the effect of treatment with 0-5  $\mu$ M **22** over four days; (E) Effect of 5  $\mu$ M costunolide or parthenolide on the (i) viability of the indicated cell lines following 72-h treatment, or (ii) pStat3 and Stat3 levels, measured by immunoblotting analysis of whole-cell lysates from U251MG cells following 0-24 h treatment; (E and F) Cell viability plots for the effects of 72-h treatments with (F) 5  $\mu$ M of the designated analogs on the indicated human tumor or mouse cell lines, and (G) 0-5  $\mu$ M of the designated analogs on U251MG cells. Insert,  $IC_{50}$  values determined from the dose-response curves; (H) U251MG cells in culture were treated once with 0-5  $\mu$ M **6**, **10** or **22** and viable cell numbers at 19 h post-treatment were counted and plotted; (I) U251MG cells growing on glass cover slips were synchronized by double thymidine block, released, and treated or untreated with the designated compounds for 15 h and processed for confocal microscopy imaging analysis of  $\beta$ -tubulin, MAP1B, and DAPI using a Leica TCS SP5 confocal microscope. Images were captured and processed using LAS AF Lite software; Yellow arrowheads indicate poles; (J) Immunoblots of poly ADP ribose polymerase (PARP), caspase, tubulin and GAPDH and the effects of treatment with **22**, paclitaxel (Pax), and staurosporine (Staur) at the designated concentrations for 24 or 48 h; and (K) Human glioma patient-derived xenograft cells, G22 growing as 3D spheroids formed over a 48-h duration, were untreated (DMSO) or treated once with 5  $\mu$ M **6**, **10** or **22** for 24 h prior to (-) the addition of matrigel (+), and allowed to grow for up to 120 h and imaged at 24 h intervals, which are shown. Green arrowheads indicate areas of extensive disaggregation. Positions of proteins in gel are labeled; control lane (-, 0) represents whole-cell lysates or cells treated with 0.025% DMSO. Data are representative of 2-4 independent determinations. Values are the mean  $\pm$  S.D, n=3-4.

Fig. S6.

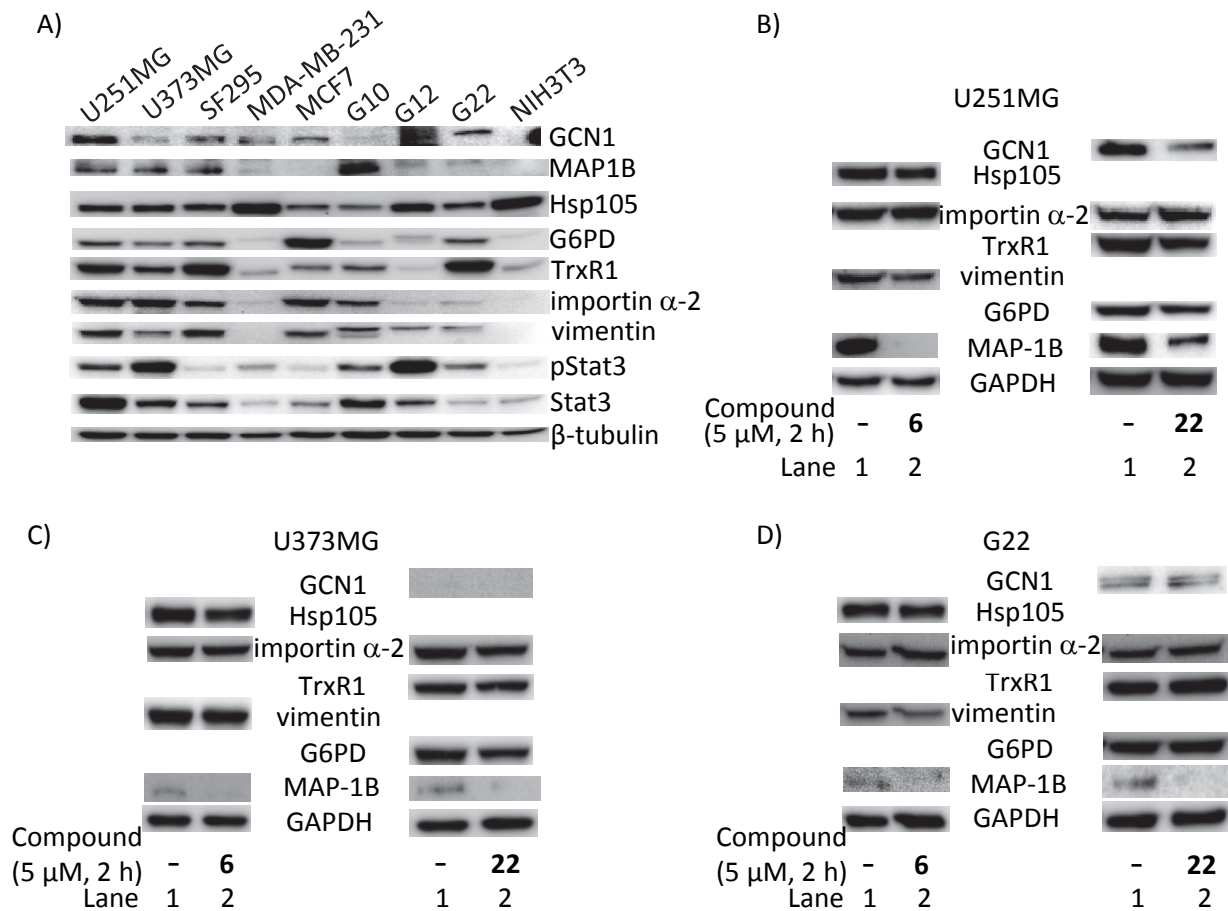

Figure S6. **Hirsutinolides modulate GCN1, Hsp105, importin  $\alpha$ -2, vimentin, G6PD, TrxR1 or MAP1B protein expression.** (A-D) Hsp105, importin subunit  $\alpha$ -2, vimentin, TrxR1, GCN1, G6PD, MAP1B, GAPDH, and  $\beta$ -tubulin immunoblots in whole-cell lysates from the designated cell lines and patient-derived xenograft cells (A) untreated or (B-D) treated with 5  $\mu$ M **6** or **22** for 2 h. Positions of proteins in gel are labeled; control lane (-) represents whole-cell lysates prepared from 0.025% DMSO-treated cells. Data are representative of 3 independent determinations.

Fig. S7.

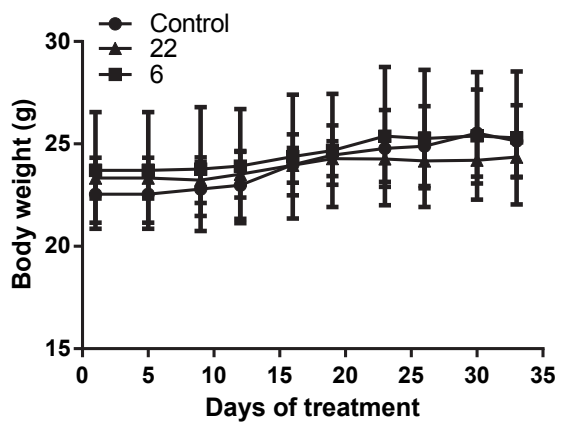



Figure S7. **Body weights of tumor-bearing mice treated with hirsutinolides.** Plots of body weight against days of treatment for mice bearing human glioma (U251MG) tumors and treated with **6** or **22** via oral gavage, 2 mg/kg or vehicle (1% DMSO) every other day for the indicated times. Body weights of mice were measured every 3-4 days and plotted.
